# Supplementary material for: A basal gradient of Wnt and stem-cell number influences regional tumour distribution in human and mouse intestinal tracts
Source: PubMed Central journal article supplement — Gut. 2012 Jan 27;62(1):83–93. doi: 10.1136/gutjnl-2011-301601 (PMC3551213; doi:10.1136/gutjnl-2011-301601), 2012-01-27
Supplement: gutjnl-2011-301601-s1.pdf [file gutjnl-2011-301601-s1.pdf]

## **Supplementary information.**

### **A basal gradient of Wnt and stem-cell number influences regional tumor distribution in human and mouse intestinal tracts**

#### **Supplementary Methods**

##### **Ethics and animal husbandry**

All mouse work was approved by the UK Home Office and local ethics committee. Mice were housed in the barrier unit of Cancer Research UK, Clare Hall Laboratories. Human archival tissue was obtained from St Marks Hospital, Harrow with multicentre ethics approval (MREC05/Q1606/66). Endoscopic biopsy tissue was obtained from the John Radcliffe Hospital, Oxford with local REC approval (REC 10/H0604/72)

##### **Transgenic stabilized $\beta$ -catenin mouse**

###### *Animal breeding and collection of samples*

Mice were genotyped for exon 3 excision using the following primers:  $\beta$ -catenin exon 3 forward GCTGCGTGGACAATGGCTAC, reverse GCTTTTCTGTCCGGCTCCAT giving approximately 350bp fragment for mutant alleles and a 550bp fragment for wild-type alleles. Cre recombinase was detected with: forward CCGTCGATGCAACGAGTGATGAGG and reverse CCAGAGACGGAAATCCATCGCTCG primers. Intra peritoneal tamoxifen (5 consecutive days of 100 $\mu$ l of 10mg/ml tamoxifen) initiated Cre recombination in 6 week old mice, as mice of this age have undergone post-natal intestinal crypt clonal purification and are maintained on an adult diet. Mice were sacrificed at a specified time after recombination or when symptomatic (anaemic secondary to intestinal lesions or experiencing rectal prolapse). The mean time to sacrifice was 5 weeks. The intestinal tract was divided into four segments - three equal length segments of small bowel (proximal SB1, middle SB2 and distal SB3) and the colon. Each segment was flushed with phosphate buffered saline, opened longitudinally and laid out on filter paper. The samples were fixed in 10% neutral buffered formalin for 24 hours and stored in 70% ethanol. Histology samples were processed using standard methods.

#### *Assessment of colonic Cre-mediated recombination.*

Formalin fixed paraffin embedded (FFPE) colonic sections from three heterozygotes (*Ctnnb1<sup>ex3/+</sup>*) and four wild-type mice were digested overnight with 30 $\mu$ L of Picopure™ proteinase K. TaqMan assays were designed and optimized by Applied Biosystems (Applied Biosystems, Carlsbad, Ca, USA) to the exon 3 region of the  $\beta$ -catenin gene, which is deleted in the genetically modified mice and to the exon 6 region of *ribonuclease P protein subunit p30* gene (*Rpp30*), chosen as an endogenous control following the manufacturer's recommendation. Standard curves were set up using six consecutive 2-fold dilutions of DNA extracted from a wild type mouse and were run for both  $\beta$ -catenin and *Rpp30* at all times. Colonic epithelial tissue was laser dissected away from the contaminating stroma and extracted DNA from wild-type and heterozygous mutant mice were run on the same plates and the amount of residual  $\beta$ -catenin exon 3 DNA was automatically inferred by the program from the standard curve for each gene. Values for  $\beta$ -catenin were then normalized to those for the endogenous control *Rpp30*.

#### *Immunohistochemistry*

Gut roll sections were de-waxed and rehydrated by standard methods. Endogenous peroxidase was blocked with 3% H<sub>2</sub>O<sub>2</sub> in methanol for 10 minutes. Antigen retrieval was achieved by 10 minutes pressure-cooking in sodium citrate buffer at pH 6. Slides were incubated in 3% bovine serum albumin in phosphate buffered saline (PBS) for 15 minutes. Slides underwent primary antibody incubation with varying dilutions of different mouse monoclonal antibodies (Supplementary table 1). This was followed by 1:500 dilution biotinylated rabbit anti-mouse secondary antibodies (DAKO, Glostrup, Denmark) before application of a 1:500 dilution of the tertiary layer of peroxidase-conjugated streptavidin (strep-HRP: DAKO, Denmark). Each layer was applied for 45 minutes and three 5-minute PBS washes were performed between layers. Sections were then developed with 3,3-diaminobenzidine-tetrahydrochloride solution (DAB; Sigma, Gillingham, UK) for 2 minutes, followed by rinsing in tap

water and light haematoxylin counterstaining. Negative controls underwent all steps but were incubated with PBS instead of the primary antibody solution.

### ***In situ* hybridization**

4µm serial sections of formalin fixed paraffin-embedded human duodenal, ileal and colonic biopsies from 11 different patients and wild-type and transgenic mouse gut rolls were cut. Exon-spanning riboprobes were designed for human and mouse *Lgr5* and a  $\beta$ -actin probe was used for hybridization control. Riboprobes were generated by in vitro transcription using SP6 polymerase and labeled with S<sup>35</sup>-UTP (human and mouse *Lgr5*) or H<sup>3</sup>-UTP (mouse *Lgr5* only) (GE Healthcare, Chalfont St Giles, UK). Other methods were as described by Poulsom *et al*<sup>1</sup> In H<sup>3</sup>-UTP based assays on normal mouse intestines, the number of *Lgr5* positive cells ( $\geq 4$  silver granules present) per crypt were counted by three different investigators (PRC, AL, SJL) on 100 crypts from each region in three different wild-type animals.

### **Normal mouse and human whole mount crypt analysis.**

#### ***Tissue processing***

Tissue was incubated in 5mls of Dulbecco's modified Eagle medium (Invitrogen) with added 30mmol/L ethylenediaminetetraacetic acid (EDTA; Sigma, UK), 0.1 mol/L dithiothreitol, and 100µl RNA later solution (Ambion, Austin, TX, USA) for 15 minutes. Tissue was transferred to phosphate buffered saline (PBS) and then vigorously shaken for 20 seconds. Individual intestinal crypts were then drawn up using glass pipettes and transferred to RNA lysis buffer (Qiagen, Crawley, UK). After several cycles of shaking with fresh PBS washes, complete epithelial denudement occurred and the residual mesenchymal tissue was collected and processed.

#### ***RNA extraction, reverse transcription and quantitative PCR (qRT-PCR)***

RNA was extracted from individual whole mount crypts using the RNAeasy Micro kit (Qiagen, UK) which includes an on-column DNase step. Obtained RNA quality was assessed on a Bioanalyser (Agilent, Santa Clara, Ca, USA). Reverse transcription was completed straight after RNA extraction using ABI high

capacity RNA to cDNA kit (Applied Biosystems, Carlsbad, Ca, USA). Taqman Pre-Amp Mastermix (Applied Biosystems, USA) was used to pre-amplify individual crypt cDNA. The intron-spanning pre-optimized Taqman probes used, were assessed using control cDNA to ensure that no amplification bias was introduced. Quantative RT-PCR was carried out on a 7900 Fast real-time PCR machine (Applied Biosystems, USA) using the same Taqman probes used for pre-amplification. Results were normalized to *GAPDH* and analysis was completed using the standard  $\Delta\Delta C_t$  method.

### **Tissue culture**

The rat RIE-1 small intestinal cell line was grown in RPMI medium with 10% foetal calf serum (FCS). Cells were plated out and left to grow to about 80% confluence. Following serum starvation for 24 hours, fresh serum-free medium supplemented with increasing doses of recombinant mouse Sfrp2 was added (Sfrp2 at 15nM, 150nM and 300nM concentrations). Cells were harvested after 4 hours, RNA was extracted and underwent DNase treatment and reverse transcription. qRT-PCR was then carried out for *Axin2*, an established Wnt target gene in these cells (Leedham 2010, unpublished) to assess the effect of Sfrp2 on endogenous Wnt target gene expression.

### **Archival human sporadic and FAP associated polyyps and tumors**

#### *Tissue processing*

Serial sections were cut from each block, dewaxed and carefully needle dissected using an H&E stained slide as a guide. Muscularis mucosa tissue was taken from colectomy specimens for constitutional DNA. Dissected tissue was digested overnight in 40 $\mu$ L of Picopure™ proteinase K (Arcturus Bioscience, Mt View, CA). DNA was extracted and used for *APC* sequencing and 5qLOH analysis

#### *APC sequencing and 5qLOH analysis*

DNA underwent sequencing of the mutation cluster region of *APC* using previously described primers and PCR conditions <sup>2</sup>. All samples were sequenced directly in forward and reverse orientation from a new PCR product. *APC* codons 1-1220 were also sequenced in one sample in an attempt to find mutations 5' to

the MCR. All samples underwent 5q LOH assessment using microsatellite markers D5S346, D5S421 and D5S646. Forward primers were labeled with a FAM or HEX fluorescent tag allowing identification of the two separated alleles using GENOTYPER software (Perkin-Elmer, Waltham, MASS, USA). Constitutionally homozygous markers were scored as non-informative. LOH at each marker was considered present if the area under one allelic peak in the affected crypt was less than 0.5 times or greater than 2 times that of the other allele, after normalizing the peak areas relative to constitutional DNA.

#### *Data collection from public mutation databases (COSMIC v53)*

Data were selected if both the mutation status of each *APC* allele was known (truncating mutation or LOH), and if adequate positional information to determine tumour location in the colon (right colon or left colon) was available. The number of retained 20AAR's on each mutated allele was calculated as described in the supplementary methods.

#### *Calculation of retained 20AAR's*

The total number of remaining 20AARs on the mutated allele(s) was calculated for each tumor; in cases where the tumor had two truncating *APC* mutations this was the sum of the number of 20AARs remaining on each allele; in cases where the tumor had LOH the total number of retained 20AARs was assumed to be twice the number retained on the truncated allele due to mitotic recombination.

### **Supplementary results**

#### **Recombinant Sfrp2 antagonises endogenous Wnt activity in RIE-1 cells.**

The secreted frizzled related proteins share sequence homology with the frizzled Wnt receptor and were initially identified as secreted extracellular attenuators of Wnt, exerting their antagonistic effect by binding and sequestering Wnt proteins. In a comprehensive assessment of Sfrp action in chick neural tube cells, Sfrp2 was shown to be the most effective wnt antagonist inhibiting both endogenous and ectopic Wnt-3a induced  $\beta$ -catenin accumulation <sup>3</sup>. However subsequent studies in neonatal mouse intestinal cells <sup>4</sup> kidney and salivary gland

cells <sup>5</sup> demonstrated that Sfrp2 enhanced the effect of recombinant Wnt-3a promoting nuclear  $\beta$ -catenin accumulation and resulting in Wnt target gene expression.

We have shown that physiological *Sfrp2* expression varies considerably in the mouse intestine with colonic mesenchymal expression more than 130 fold greater than that seen in the small intestine. Furthermore this gradient is the reverse of that seen in the human (supplementary figure 1). In order to assess the effects of Sfrp2 on endogenous Wnt activity in a normal rodent intestine cell system we measured Wnt target gene expression in response to physiological and supra-physiological doses of recombinant Sfrp2. In this cell system we saw a dose dependent decrease in wnt target gene activity following incubation with recombinant Sfrp2, demonstrating that in rodent intestinal cells, Sfrp2 antagonises endogenous Wnt activity.

**Supplementary table 1**

| <b>Antibody</b>           | <b>Specificity</b>        | <b>Species</b> | <b>Dilution</b> | <b>Antigen retrieval</b>               | <b>Source</b>    |
|---------------------------|---------------------------|----------------|-----------------|----------------------------------------|------------------|
| <b>Primary antibody</b>   |                           |                |                 |                                        |                  |
| $\beta$ -catenin (610154) | Activation of Wnt pathway | Mouse          | 1:100           | Pressure cook in sodium citrate buffer | BD Biosciences   |
| Ki-67 (MIB1) (M7249)      | S-phase marker            | Rat            | 1:125           | Pressure cook in sodium citrate buffer | DAKO             |
| Cleaved caspase 3 (AF835) | Apoptotic cells           | Rabbit         | 1:800           | Pressure cook in sodium citrate buffer | R&D systems      |
| Lysozyme (A0099)          | Paneth cells              | Rabbit         | 1:500           | Pressure cook in sodium citrate buffer | DAKO             |
| Chromogranin A (15160)    | Entero-endocrine cells    | Rabbit         | 1:1000          | Pressure cook in sodium citrate buffer | Abcam            |
| <b>Secondary antibody</b> |                           |                |                 |                                        |                  |
| IgG Biotin conjugate      | Anti-mouse                | Rabbit         | 1:300           | Applied as secondary layer             | DAKO             |
| IgG Biotin Conjugate      | Anti-rabbit               | Goat           | 1:300           | Applied as secondary layer             | Molecular Probes |

**Supplementary table 1. Antibodies, dilutions and conditions.**

**Supplementary table 2A: Mouse whole mount crypt gene expression by qRT-PCR**

| Epithelial Gene/patient | SB1               |              | SB2               |              | SB3               |              | Caecum            |              | Rectum            |              | ANOVA   |
|-------------------------|-------------------|--------------|-------------------|--------------|-------------------|--------------|-------------------|--------------|-------------------|--------------|---------|
|                         | Mean (SEM)<br>ΔCt | ΔΔCt         |         |
| <b><i>Ascl2</i></b>     |                   |              |                   |              |                   |              |                   |              |                   |              | p<0.001 |
| Mouse 1                 | 5.6 (0.09)        | -1.59        | 5.8 (0.16)        | -1.39        | 5.7 (0.49)        | -1.5         | 7.2 (0.17)        | 0            | 7.2 (0.36)        | -0.03        |         |
| Mouse 2                 | 5.2 (0.26)        | -3.67        | 6.7 (0.07)        | -2.13        | 7.9 (0.17)        | -1           | 8.9 (0.27)        | 0            | 7.6 (0.32)        | -1.26        |         |
| Mouse 3                 | 4.5 (0.32)        | -3.18        | 5.9 (0.15)        | -1.72        | 3.1 (0.54)        | -2.5         | 7.6 (0.56)        | 0            | 6.2 (0.1)         | -1.42        |         |
| Mean (SEM)              | 5.1 (0.35)        | -2.8 (0.62)  | 6.16 (0.29)       | -1.75 (0.21) | 6.2 (0.84)        | -1.7 (0.44)  | 7.9 (0.49)        | 0            | 7 (0.42)          | -0.9 (0.44)  |         |
| <b><i>Lgr5</i></b>      |                   |              |                   |              |                   |              |                   |              |                   |              | p<0.001 |
| Mouse 1                 | 6.7 (0.17)        | -1.8         | 7.3 (0.39)        | -1.2         | 6.5 (0.4)         | -2.02        | 8 (0.23)          | -0.54        | 8.5 (0.31)        | 0            |         |
| Mouse 2                 | 7.6 (0.05)        | -2.2         | 7.3 (0.28)        | -2.6         | 7 (0.18)          | -2.86        | 9.8 (0.31)        | 0            | 9 (0.41)          | -0.84        |         |
| Mouse 3                 | 7.4 (0.17)        | -2           | 8.6 (0.19)        | -0.7         | 6.9 (0.4)         | -2.47        | 9.4(0.64)         | 0            | 8.3 (0.23)        | -1.04        |         |
| Mean (SEM)              | 7.23 (0.26)       | -2 (0.13)    | 7.73 (0.45)       | -1.51 (0.55) | 6.79 (0.15)       | -2.45 (0.24) | 9.05 (0.56)       | -0.18 (0.18) | 8.61 (0.2)        | -0.63 (0.32) |         |
| <b><i>Olfm4</i></b>     |                   |              |                   |              |                   |              |                   |              |                   |              | p<0.001 |
| Mouse 1                 | -0.6 (0.1)        | -7.39        | -1 (0.25)         | -7.8         | -0.6(0.59)        | -7.4         | 6.5 (0.36)        | -0.29        | 6.8 (0.38)        | 0            |         |
| Mouse 2                 | -0.2 (0.32)       | -11.79       | -0.6 (0.08)       | -12.15       | 1 (0.27)          | -10.6        | 11.6 (0.2)        | 0            | 9.3 (0.27)        | -2.21        |         |
| Mouse 3                 | -0.3 (0.27)       | -9.28        | 0.3 (0.06)        | -8.7         | -0.6(0.45)        | -9.5         | 8.95 (1.12)       | 0            | 7.5 (1.45)        | -1.49        |         |
| Mean (SEM)              | 0.08 (0.42)       | -9.49 (1.27) | -0.44 (0.37)      | -9.54 (1.33) | -0.66 (0.58)      | -9.15 (0.9)  | 11.46 (1.54)      | -0.1 (0.1)   | 7.87 (0.76)       | -1.23 (0.65) |         |
| <b><i>Sox4</i></b>      |                   |              |                   |              |                   |              |                   |              |                   |              | p<0.001 |
| Mouse 1                 | 9.1 (0.01)        | -2.9         | 10.1 (0.27)       | -1.9         | 10.0 (0.39)       | -2           | 11.6 (0.2)        | -0.4         | 12.0 (0.2)        | 0            |         |
| Mouse 2                 | 9.9 (0.02)        | -2.8         | 10.6 (0.22)       | -2.1         | 10.6 (0.21)       | -2           | 12.6 (0.4)        | 0            | 11.6 (0.3)        | -1           |         |
| Mouse 3                 | 9.2 (0.32)        | -3.3         | 11 (0.21)         | -1.6         | 10.3 (0.28)       | -2.2         | 12.5 (0.3)        | 0            | 10.7 (0.2)        | -1.9         |         |
| Mean (SEM)              | 9.4 (0.24)        | -2.99 (0.18) | 10.55 (0.25)      | -1.84 (0.16) | 10.3 (0.17)       | -2.09 (0.07) | 12.26 (0.33)      | -0.13 (0.13) | 11.43 (0.39)      | -0.97 (0.53) |         |
| <b><i>Bmp2</i></b>      |                   |              |                   |              |                   |              |                   |              |                   |              | p<0.001 |
| Mouse 1                 | 9.2 (0.32)        | 0            | 9.2 (0.09)        | -0.1         | 7.3 (0.1)         | -1.9         | 7.5 (0.2)         | -1.7         | 6.3 (0.5)         | -2.9         |         |
| Mouse 2                 | 8.8 (0.11)        | 0            | 8.6 (0.22)        | -0.3         | 7.2 (0.22)        | -1.6         | 8.5 (0.6)         | -0.3         | 5.7 (0.2)         | -3.1         |         |
| Mouse 3                 | 10.3 (0.27)       | 0            | 9.7 (0.41)        | -0.6         | 8 (0.62)          | -2.2         | 7.2 (0.4)         | -3.1         | 5.9 (0.3)         | -4.4         |         |
| Mean (SEM)              | 9.44 (0.43)       | 0            | 9.14 (0.32)       | -0.3 (0.15)  | 9.01 (0.34)       | -1.9 (0.17)  | 7.71 (0.4)        | -1.73 (0.8)  | 5.96 (0.16)       | 3.48 (0.45)  |         |
| <b><i>Axin2</i></b>     |                   |              |                   |              |                   |              |                   |              |                   |              | p<0.001 |
| Mouse 1                 | 4.05 (0.04)       | -2.4         | 4.03 (0.34)       | -2.4         | 4 (0.28)          | -2.5         | 6.2 (0.28)        | -0.31        | 6.47 (0.1)        | 0            |         |
| Mouse 2                 | 4.32 (0.09)       | -3.1         | 4.5 (0.24)        | -2.9         | 4.3 (0.14)        | -3.1         | 7.4 (0.19)        | 0            | 5.79 (0.2)        | -1.6         |         |
| Mouse 3                 | 3.73 (0.42)       | -4.3         | 4 (0.3)           | -4           | 4.3 (0.34)        | -3.8         | 8.1 (0.1)         | 0            | 6.37 (0.55)       | -1.7         |         |
| Mean (SEM)              | 4.03 (0.17)       | -3.28 (0.56) | 4.19 (0.15)       | -3.13 (0.47) | 4.18 (0.09)       | -3.14 (0.37) | 7.21 (0.34)       | -0.1 (0.1)   | 6.21 (0.21)       | -1.1 (0.55)  |         |
| <b><i>Ccnd1</i></b>     |                   |              |                   |              |                   |              |                   |              |                   |              | p<0.001 |
| Mouse 1                 | 4.8 (0.13)        | -2.1         | 4.8 (0.25)        | -2.1         | 4.2 (0.27)        | -2.7         | 6.3 (0.08)        | -0.6         | 6.9 (0.22)        | 0            |         |
| Mouse 2                 | 5.1 (0.19)        | -1.6         | 4.15 (0.19)       | -2.5         | 3.7 (0.18)        | -3           | 6.7 (0.21)        | 0            | 5.7 (0.07)        | -1           |         |
| Mouse 3                 | 4.95 (0.33)       | -2.4         | 5.8 (0.14)        | -1.5         | 3.9 (0.22)        | -3.9         | 7.3 (0.44)        | 0            | 6.4 (0.19)        | -0.9         |         |
| Mean (SEM)              | 4.96 (0.08)       | -2.02 (0.25) | 4.93 (0.48)       | -2.05 (0.29) | 3.78 (0.24)       | -3.2 (0.37)  | 6.78 (0.29)       | -0.2 (0.2)   | 6.33 (0.37)       | -0.65 (0.32) |         |

|                          |              |              |              |              |              |              |              |              |              |              |         |
|--------------------------|--------------|--------------|--------------|--------------|--------------|--------------|--------------|--------------|--------------|--------------|---------|
| <b><i>EphB2</i></b>      |              |              |              |              |              |              |              |              |              |              |         |
| Mouse 1                  | 4.8 (0.16)   | -0.5         | 4.8 (0.25)   | -0.5         | 4.3 (0.3)    | -1           | 4.5 (0.2)    | -0.82        | 5.3 (0.14)   | 0            | p=0.1   |
| Mouse 2                  | 2 (0.89)     | -3.7         | 4.1 (0.25)   | -1.6         | 4.1 (0.15)   | -1.56        | 5.7 (0.4)    | 0            | 5.1 (0.31)   | -0.56        |         |
| Mouse 3                  | 4.5 (0.24)   | -1.85        | 5.3 (0.13)   | -1           | 4.6 (0.42)   | -1.8         | 6.3 (0.02)   | 0            | 5.15 (0.20)  | -1.2         |         |
| Mean (SEM)               | 3.75 (0.88)  | -2.02 (0.91) | 4.74 (0.37)  | -1.03 (0.34) | 4.33 (0.12)  | -1.44 (0.23) | 5.49 (0.54)  | -0.27 (0.27) | 5.19 (0.06)  | -0.58 (0.33) |         |
| <b><i>Left</i></b>       |              |              |              |              |              |              |              |              |              |              |         |
| Mouse 1                  | 11.8 (0.23)  | -1.2         | 12.1(2)      | -0.9         | 12.6 (0.28)  | -0.4         | 13 (0.34)    | 0            | 12.8 (1.2)   | -0.2         | p=0.7   |
| Mouse 2                  | 14.4 (1.12)  | -0.4         | 13.2 (0.84)  | -1.6         | 13.5 (1.09)  | -1.4         | 14.8 (0.54)  | 0            | 14.3 (0.3)   | -0.55        |         |
| Mouse 3                  | 12.6 (0.07)  | -2.1         | 14.6 (0.68)  | -0.1         | 14 (0.95)    | -0.7         | 13.2 (1.02)  | -1.5         | 14.7 (1.1)   | 0            |         |
| Mean (SEM)               | 12.92 (0.78) | -1.27 (0.49) | 13.29 (0.72) | -0.9 (0.43)  | 13.36 (0.41) | -0.82 (0.28) | 13.68 (0.59) | -0.51 (0.51) | 13.94 (0.58) | -0.25 (0.16) |         |
| <b><i>EphB3</i></b>      |              |              |              |              |              |              |              |              |              |              |         |
| Mouse 1                  | 8.7 (0.17)   | -1           | 8.1 (0.4)    | -1.6         | 7.8 (0.3)    | -1.9         | 9.7 (0.27)   | 0            | 8.4 (0.1)    | -1.3         | p=0.1   |
| Mouse 2                  | 7.4(0.13)    | -1.9         | 7.9 (0.2)    | -1.3         | 7.8 (0.31)   | -1.4         | 9.2 (0.35)   | 0            | 7.6 (0.2)    | -1.6         |         |
| Mouse 3                  | 5.7 (0.14)   | -4.3         | 9.8 (0.23)   | -0.1         | 8.4 (0.43)   | -1.6         | 10 (0.35)    | 0            | 8.1 (0.37)   | -1.8         |         |
| Mean (SEM)               | 7.25 (0.88)  | -2.38 (0.98) | 8.6 (0.62)   | -1.03 (0.46) | 8 (0.17)     | -1.63 (0.14) | 9.63 (0.22)  | 0            | 8.06 (0.23)  | -1.57 (0.16) |         |
| <b><i>Mmp7</i></b>       |              |              |              |              |              |              |              |              |              |              |         |
| Mouse 1                  | 5.6 (0.44)   | -5.9         | 4.4 (0.85)   | -7.1         | 4.9 (0.31)   | -6.6         | 11.3 (0.28)  | -0.2         | 11.5 (0.55)  | 0            | p<0.001 |
| Mouse 2                  | 5.3 (0.04)   | -8.9         | 4 (0.28)     | -10.2        | 4.4 (0.37)   | -9.8         | 14.14(0.79)  | 0            | 14.1 (1.13)  | -0.04        |         |
| Mouse 3                  | 6.05 (0.52)  | -8           | 8.3 (1.04)   | -5.8         | 7.35 (0.15)  | -6.7         | 14.1 (1.01)  | 0            | 12.6 (1.28)  | -1.45        |         |
| Mean (SEM)               | 5.63 (0.23)  | -7.6 (0.88)  | 5.5 (1.37)   | -7.7 (1.3)   | 5.55 (0.91)  | -7.68 (1.04) | 13.17 (0.94) | -0.06 (0.06) | 12.74 (0.76) | -0.5 (0.5)   |         |
| <b><i>Grem 1 (m)</i></b> |              |              |              |              |              |              |              |              |              |              |         |
| Mouse 1                  | 4.8          | -1.1         | 5.7          | 0            | 2.5          | -3.2         | 4.3          | -1.4         | 5.0          | 0.7          | p=0.36  |
| Mouse 2                  | 7.3          | 0            | 4.5          | -2.8         | 3.3          | -4           | 4.7          | -2.6         | 3.2          | -4.1         |         |
| Mouse 3                  | 4.4          | -1           | 5.4          | 0            | 5            | -0.4         | 3.8          | -1.6         | 4.9          | -0.5         |         |
| Mean (SEM)               | 5.5 (0.9)    | 0.7 (0.35)   | 5.2 (0.4)    | 0.93 (0.9)   | 3.6 (0.7)    | -2.53 (1.1)  | 4.3 (0.3)    | -1.86 (0.4)  | 4.4 (0.6)    | -1.3 (1.44)  |         |
| <b><i>Grem 2 (m)</i></b> |              |              |              |              |              |              |              |              |              |              |         |
| Mouse 1                  | 7.0          | 0            | 6.0          | -1           | 5.6          | -1.4         | 3.1          | -3.9         | 5.6          | -1.4         | p=0.05  |
| Mouse 2                  | 11.0         | 0            | 7.1          | -3.9         | 7.1          | -3.9         | 3.6          | -7.4         | 5.4          | -5.6         |         |
| Mouse 3                  | 7.8          | 0            | 7.6          | -0.2         | 6.5          | -1.3         | 3.6          | -4.2         | 7.4          | -0.4         |         |
| Mean (SEM)               | 8.6 (1.2)    | 0            | 6.9 (0.5)    | -1.7 (1.1)   | 6.4 (0.4)    | -2.2 (0.85)  | 3.4 (0.2)    | -5.2 (1.12)  | 6.1 (0.6)    | -2.5 (1.6)   |         |
| <b><i>Hgf (m)</i></b>    |              |              |              |              |              |              |              |              |              |              |         |
| Mouse 1                  | 8.0          | -1.9         | 7.4          | -2.5         | 8.4          | -1.5         | 8.4          | -1.5         | 9.9          | 0            | p=0.04  |
| Mouse 2                  | 7.8          | -2           | 8.4          | -1.5         | 9.8          | 0            | 8.9          | -0.9         | 9.7          | -0.1         |         |
| Mouse 3                  | 8.2          | -3.4         | 8.7          | -2.9         | 9            | -2.6         | 8.6          | -3           | 11.6         | 0            |         |
| Mean (SEM)               | 8 (0.1)      | -2.4 (0.5)   | 8.2 (0.4)    | -2.3 (1.7)   | 9.1 (0.4)    | -1.36 (0.75) | 8.6 (0.1)    | -1.8 (0.6)   | 10.4 (0.6)   | -0.03 (0.03) |         |
| <b><i>Sfrp2 (m)</i></b>  |              |              |              |              |              |              |              |              |              |              |         |
| Mouse 1                  | 13.7         | 0            | 13.7         | 0            | 11.8         | -1.9         | 7.4          | -6.3         | 6.9          | -6.8         | p=0.035 |
| Mouse 2                  | 15.6         | 0            | 12.3         | -3.3         | 14.3         | -1.3         | 8.6          | -7           | 5.9          | -9.7         |         |
| Mouse 3                  | 10.8         | 4.9          | 15.7         | -4.9         | 14.3         | -1.4         | 2.5          | -13.2        | 7.1          | -8.          |         |
| Mean (SEM)               | 13.4 (1.4)   | - 1.63 (1.6) | 15.6 (2.6)   | -2.7 (1.4)   | 13.5 (0.8)   | -1.5 (0.18)  | 6.2 (1.9)    | -8.8 (2.2)   | 6.6 (0.4)    | -8.4 (0.8)   |         |

**Supplementary table 2B: Human whole mount crypt gene expression by qRT-PCR**

| Epithelial Gene/patient | Duodenum          |              | Ileum             |              | Caecum            |              | Rectum            |              | ANOVA   |
|-------------------------|-------------------|--------------|-------------------|--------------|-------------------|--------------|-------------------|--------------|---------|
|                         | Mean (SEM)<br>ΔCt | ΔΔCt         |         |
| <b>LGR5</b>             |                   |              |                   |              |                   |              |                   |              |         |
| Patient 1               | 6.7 (0.64)        | -2.4         | 5.5 (0.27)        | -3.6         | 6.2 (0.61)        | -3           | 9.1 (1.1)         | 0            | p<0.001 |
| Patient 2               | 7.5 (0.74)        | -0.8         | 5.3 (0.95)        | -3           | 7.7 (0.46)        | -0.56        | 8.3 (0.2)         | 0            |         |
| Patient 3               | 9 (0.55)          | -1.4         | 5.5 (0.38)        | -3.9         | 9.4 (0.21)        | 0            | 9.4 (0.2)         | 0            |         |
| Patient 4               | 6.6 (0.23)        | -2.3         | 6.2 (0.22)        | -2.7         | 7.8 (0.25)        | -1.1         | 8.9 (0.4)         | 0            |         |
| Mean (SEM)              | 7.2 (0.32)        | -1.74 (0.38) | 5.6 (0.2)         | -3.32 (0.29) | 7.8 (0.66)        | -1.17 (0.65) | 8.94 (0.24)       | 0            |         |
| <b>OLFM4</b>            |                   |              |                   |              |                   |              |                   |              |         |
| Patient 1               | -2 (0.5)          | -4.5         | -4.1 (0.23)       | -6.6         | 1.6 (0.6)         | -0.9         | 2.5 (1.5)         | 0            | p<0.001 |
| Patient 2               | -2.1(0.2)         | -3.9         | -2.1 (0.37)       | -3.9         | -1.9 (0.4)        | -3.6         | 1.8 (1.16)        | 0            |         |
| Patient 3               | 0.01 (0.2)        | -4           | -1.8 (0.33)       | -5.8         | -0.6 (0.8)        | -4.6         | 4 (0.3)           | 0            |         |
| Patient 4               | -1 (0.6)          | -6.6         | -1.9 (0.1)        | -7.5         | -0.6 (0.4)        | -6.2         | 5.5 (0.25)        | 0            |         |
| Mean (SEM)              | -1.29 (0.5)       | -4.8 (0.62)  | -2.5 (0.55)       | -5.94 (0.77) | -0.37 (0.73)      | -3.83 (1.11) | 3.46 (0.84)       | 0            |         |
| <b>BMP2</b>             |                   |              |                   |              |                   |              |                   |              |         |
| Patient 1               | 7.8 (0.2)         | 0            | 7.6 (0.2)         | -0.14        | 5 (0.6)           | -2.8         | 4.8 (0.1)         | -3           | p<0.001 |
| Patient 2               | 6.5 (0.7)         | -0.9         | 7.3 (0.4)         | 0            | 5.3 (0.3)         | -2           | 4.9 (0.2)         | -2.4         |         |
| Patient 3               | 7.9 (0.5)         | -2.9         | 10.7(0.7)         | 0            | 6.7 (0.4)         | -4           | 5.1 (0.1)         | -5.6         |         |
| Patient 4               | 8.7 (0.1)         | -0.3         | 9 (0.2)           | 0            | 8.5 (0.3)         | -0.5         | 5.4 (0.5)         | -3.6         |         |
| Mean (SEM)              | 7.7 (0.46)        | -0.99 (0.61) | 8.65 (0.76)       | -0.04 (0.04) | 6.39 (0.8)        | -2.3 (0.74)  | 5.04 (0.13)       | -3.65 (0.69) |         |
| <b>AXIN2</b>            |                   |              |                   |              |                   |              |                   |              |         |
| Patient 1               | 5.2 (0.4)         | 0            | 3.8 (0.16)        | -1.4         | 3.9 (0.09)        | -1.3         | 4.2 (0.2)         | -0.9         | p=0.3   |
| Patient 2               | 5.3 (0.6)         | 0            | 4.2 (0.1)         | -1.1         | 4.6 (0.2)         | -0.7         | 3.5 (0.34)        | -1.8         |         |
| Patient 3               | 6.5 (0.1)         | -1.74        | 4.5 (0.2)         | -3.8         | 6.3 (0.4)         | -2           | 8.3 (0.2)         | 0            |         |
| Patient 4               | 5.2 (0.2)         | 0            | 4.2 (0.3)         | -1           | 5.2 (0.5)         | -0.1         | 3.8 (0.5)         | -1.4         |         |
| Mean (SEM)              | 5.56 (0.33)       | -0.44 (0.44) | 4.17 (0.14)       | -1.8 (0.67)  | 4.98 (0.5)        | -1.02 (0.42) | 4.95 (1.12)       | -1.04 (0.39) |         |
| <b>CCND1</b>            |                   |              |                   |              |                   |              |                   |              |         |
| Patient 1               | 4.6 (0.21)        | -1.2         | 5.8 (0.18)        | 0            | 5.4 (0.18)        | -0.37        | 5.6 (0.18)        | -0.2         | p=0.8   |
| Patient 2               | 4.3 (0.19)        | -0.6         | 4.9 (0.39)        | 0            | 4.6 (0.5)         | -0.34        | 4.6 (0.36)        | -0.34        |         |
| Patient 3               | 5.6 (0.15)        | -0.8         | 6.1 (0.35)        | -0.35        | 6.4 (0.1)         | 0            | 6 (0.07)          | -0.45        |         |
| Patient 4               | 5.3 (0.17)        | -0.6         | 5.4 (0.19)        | -0.6         | 6 (0.08)          | 0            | 5.9 (0.07)        | -0.01        |         |
| Mean (SEM)              | 4.95 (0.3)        | -0.81 (0.13) | 5.52 (0.25)       | -0.24 (0.15) | 5.58 (0.39)       | 0.18 (0.1)   | 5.51 (0.32)       | -0.25 (0.09) |         |
| <b>EPHB2</b>            |                   |              |                   |              |                   |              |                   |              |         |
| Patient 1               | 1.7 (0.4)         | -1.1         | 1.2 (0.2)         | -1.6         | 2.1 (0.3)         | -0.7         | 2.8 (0.5)         | 0            | p=0.3   |
| Patient 2               | 1.4 (0.3)         | -1.2         | 1.3 (0.01)        | -1.2         | 1.8 (0.2)         | -0.7         | 2.5 (0.2)         | 0            |         |
| Patient 3               | 3.5 (0.2)         | -1           | 2 (0.1)           | -2.5         | 3.5 (0.2)         | -1           | 4.5 (0.04)        | 0            |         |
| Patient 4               | 3.2 (0.44)        | -0.7         | 2.4 (0.1)         | -1.5         | 2.7 (0.3)         | -1.1         | 3.8(0.2)          | 0            |         |
| Mean (SEM)              | 2.43 (0.52)       | -0.97 (0.11) | 1.74 (0.28)       | -1.67 (0.28) | 2.53 (0.36)       | -0.88 (0.11) | 3.4 (0.46)        | 0            |         |

|              |             |              |              |              |              |              |              |              |        |
|--------------|-------------|--------------|--------------|--------------|--------------|--------------|--------------|--------------|--------|
| <b>LEF1</b>  |             |              |              |              |              |              |              |              |        |
| Patient 1    | 6.9 (0.42)  | -7.4         | 8.8 (0.4)    | -5.6         | 10.3 (0.5)   | -4           | 14.3 (1.3)   | 0            | p<0.01 |
| Patient 2    | 9.2 (0.37)  | -3           | 9 (0.6)      | -3.2         | 12.2 (0.6)   | 0            | 12.1 (0.3)   | -0.1         |        |
| Patient 3    | 8.9 (0.36)  | -3.5         | 7.6 (0.3)    | -4.8         | 11.8 (0.6)   | -0.5         | 12.4 (0.3)   | 0            |        |
| Patient 4    | 7.4 (0.76)  | -3.1         | 7.5 (0.2)    | -3           | 9.7 (0.4)    | -0.8         | 10.5 (0.4)   | 0            |        |
| Mean (SEM)   | 8.1 (0.55)  | -4.24 (1.04) | 8.2 (0.39)   | -4.13 (0.62) | 11.01 (0.6)  | -1.32 (0.92) | 12.31 (0.78) | -0.02 (0.02) |        |
| <b>EPHB3</b> |             |              |              |              |              |              |              |              |        |
| Patient 1    | 12.9 (0.59) | -0.54        | 11.7 (0.19)  | -1.7         | 10 (0.26)    | -3.3         | 13.4 (0.92)  | 0            | p=0.05 |
| Patient 2    | 14.8 (0.27) | 0            | 10 (0.65)    | -4.8         | 14.5 (0.62)  | -0.3         | 14 (0.16)    | -0.8         |        |
| Patient 3    | 16 (0.22)   | 0            | 13.4 (0.55)  | -2.5         | 14.8 (0.22)  | -1.1         | 14.4 (0.15)  | -1.6         |        |
| Patient 4    | 12.6 (0.55) | -2.22        | 12 (0.74)    | -2.8         | 14.4 (0.49)  | -0.4         | 14.8 (0.18)  | 0            |        |
| Mean (SEM)   | 14.05 (0.8) | -0.69 (0.52) | 11.78 (0.71) | -2.96 (0.66) | 13.47 (1.13) | -1.27 (0.7)  | 14.15 (0.3)  | -0.59 (0.38) |        |
| <b>GREM1</b> |             |              |              |              |              |              |              |              |        |
| Patient 1    | 8           | -0.3         | 7.5          | -0.8         | 7.3          | -1           | 8.3          | 0            | p=0.7  |
| Patient 2    | 7.4         | -0.3         | 7.1          | -0.6         | 6.5          | -1.2         | 7.7          | 0            |        |
| Patient 3    | 8.6         | -1.3         | 8.9          | -1           | 9.9          | 0            | 9.8          | -0.1         |        |
| Patient 4    | 8.2         | -2.2         | 8.3          | -2.1         | 10.4         | 0            | 9.9          | -0.5         |        |
| Mean (SEM)   | 8.05 (0.25) | -1.03 (0.46) | 7.95 (0.4)   | 1.13 (0.34)  | 8.53 (0.96)  | -0.55 (0.3)  | 8.9 (0.54)   | -0.15 (0.1)  |        |
| <b>GREM2</b> |             |              |              |              |              |              |              |              |        |
| Patient 1    | 6.8         | -1.1         | 7.9          | 0            | 6            | -1.9         | 6.9          | -1           | p=0.2  |
| Patient 2    | 6.4         | -2.2         | 5.3          | -3.3         | 7.3          | -1.3         | 8.6          | 0            |        |
| Patient 3    | 6           | -3.1         | 6.8          | -2.3         | 7.7          | -1.4         | 9.1          | 0            |        |
| Patient 4    | fail        | fail         | fail         | fail         | fail         | fail         | fail         | fail         |        |
| Mean (SEM)   | 6.4 (0.2)   | -2.1 (0.5)   | 6.7 (0.65)   | -1.9 (0.8)   | 7 (0.4)      | -1.5 (0.16)  | 8.2 (0.6)    | -0.3 (0.3)   |        |
| <b>HGF</b>   |             |              |              |              |              |              |              |              |        |
| Patient 1    | 5.9         | -4.5         | 6.4          | -4           | 7.1          | -3.3         | 10.4         | 0            | p=0.05 |
| Patient 2    | 6.4         | -2.2         | 8.6          | 0            | 6.2          | -2.4         | 8.5          | -0.1         |        |
| Patient 3    | 5.8         | -3.4         | 6            | -3.2         | 5            | -4.2         | 9.2          | 0            |        |
| Patient 4    | 6           | -2.6         | 5.8          | -2.8         | 5.5          | -3.1         | 8.6          | 0            |        |
| Mean (SEM)   | 6 (0.16)    | -3.4 (0.6)   | 7 (0.7)      | -2.4 (1.06)  | 6.1 (0.5)    | -3.3 (0.45)  | 9.4 (0.5)    | -0.03 (0.03) |        |
| <b>SFRP2</b> |             |              |              |              |              |              |              |              |        |
| Patient 1    | 4.8         | -1.7         | 5.85         | -0.65        | 5.4          | -1.1         | 6.5          | 0            | p=0.25 |
| Patient 2    | 6.8         | -2.4         | 9.6          | 0            | 9.4          | -0.2         | 9.2          | -0.4         |        |
| Patient 3    | 7.6         | -4.2         | 8.4          | -3.4         | 10.6         | -1.2         | 11.8         | 0            |        |
| Patient 4    | 7.8         | -4.9         | 8.7          | -4           | 10.6         | -2.1         | 12.7         | 0            |        |
| Mean (SEM)   | 6.4 (0.7)   | -2.7 (0.6)   | 7.95 (0.95)  | -1.35 (0.9)  | 8.5 (1.4)    | -0.8 (0.3)   | 9.2 (1.3)    | 0.13 (0.1)   |        |

### **Supplementary tables 2A and B.**

**qRT-PCR gene expression data for mouse (supplementary table 2A) and human (supplementary table 2B) whole mount crypts and mesenchymal sections.** Each patient or mouse  $\Delta\text{Ct}$  value was calculated from the  $\Delta\text{Ct}$  values of 4-5 individual crypts or from a single denuded mesenchymal section, for each gene from each region. Mesenchymal genes are indicated by (m). For calculation of  $\Delta\Delta\text{Ct}$  values the region with the lowest gene expression was considered baseline expression for each individual mouse/patient.  $\Delta\Delta\text{Ct}$  values for other regions were calculated against this baseline expression value. The mean (SEM)  $\Delta\Delta\text{Ct}$  (red text) is the average of the individual mouse/patient values and was used to calculate the fold change values plotted in figure 3. ANOVA was used to calculate p values for differences in absolute gene expression between different regions.

### Supplementary table 3

| Patient / Germline mutation        | Somatic mutation | Upper GI lesions        | Colonic lesions              |                         |                         |                         |                      |                         |                      |                         |
|------------------------------------|------------------|-------------------------|------------------------------|-------------------------|-------------------------|-------------------------|----------------------|-------------------------|----------------------|-------------------------|
| Patient 1<br>Deletion exon 11-13   | Truncating       | c.4660_61insA p.T1556fs | Rectum                       | Left colon              | TC 1                    | TC 2                    | TC 3                 | Right                   | AC                   | Caecum                  |
|                                    |                  |                         | c.4393_94del2 p.p.S1465fs    | c.3856G>T p.E1286X      | c.4265delA p.D1422fs    | c.4606G>T p.E1536X      | c.4259delC p.P1420fs | c.4483_84insA p.S1495fs | c.3871C>T Q1291X     | c.4742_43del2 p.S1581fs |
|                                    | LOH              | No                      | No                           | Yes                     | No                      | No                      | No                   | No                      | No                   | No                      |
|                                    | Residual 20AARs  | 3                       | 2                            | 1, 1                    | 2                       | 2                       | 2                    | 3                       | 1                    | 3                       |
| Patient 2<br>c.1660C>T p.R554X,    | Truncating       | c.4660_61insA p.T1556fs | Rectum 1                     | Rectum 2                | Rectum 3                | DC 1                    | DC 2                 | AC 1                    | AC 2                 |                         |
|                                    |                  |                         | p.S1400X                     | c.4063_64insT p.S1355fs | c.3942delG p.R1314fs    | c.4467_71del6 p.L1489fs | c.4316delC p.P1439fs | c.4464delAT p.L1488fs   | c.4191del2 p.E1397fs |                         |
|                                    | LOH              | No                      | No                           | Yes                     | No                      | No                      | No                   | No                      | No                   |                         |
|                                    | Residual 20AARs  | 3                       | 2                            | 1, 1                    | 1                       | 2                       | 2                    | 2                       | 2                    |                         |
| Patient 3<br>c.2055del11 p.W685fs  | Truncating       | c. 4613insG p. E1538fs  | Unspecified colonic location |                         |                         |                         |                      |                         |                      |                         |
|                                    |                  |                         | c.4192_93del2 p.S1398fs      | c.4308delT p.S1436fs    | c.4221_22del2 p.S1407fs | c.4476delC p. A1492fs   | c.3883G>T p.E1295X   | Complex del p.L1423fs   |                      |                         |
|                                    | LOH              | No                      | No                           | No                      | No                      | No                      | No                   |                         |                      |                         |
|                                    | Residual 20AARs  | 3                       | 2                            | 2                       | 2                       | 1                       | 2                    |                         |                      |                         |
| Patient 4<br>c. 2387 del2 p.796fs  | Truncating       | c.4291delA p.M1431fs    | Unspecified colonic location |                         |                         |                         |                      |                         |                      |                         |
|                                    |                  |                         | c.4465_66ins2 p.L1489fs      | c.4463delT p.L1488fs    |                         |                         |                      |                         |                      |                         |
|                                    | LOH              | No                      | No                           | No                      |                         |                         |                      |                         |                      |                         |
|                                    | Residual 20AARs  | 2                       | 2                            | 2                       |                         |                         |                      |                         |                      |                         |
| Patient 5<br>c. 4387del4 p.K1462fs | Truncating       | c.4012C>T p.Q1338X      | Unspecified                  |                         |                         |                         |                      |                         |                      |                         |
|                                    |                  |                         | c.4348C>T p.R1450X           |                         |                         |                         |                      |                         |                      |                         |
|                                    | LOH              | NI                      | NI                           |                         |                         |                         |                      |                         |                      |                         |
|                                    | Residual 20AARs  | 1                       | 2                            |                         |                         |                         |                      |                         |                      |                         |

| Patient 6<br>c.4630 G>T<br>p.E1544X     | Truncating          | None                            | Unspecified colonic location        |                                       |                                      |                                     |                                     |                                 |                                 |                               |
|-----------------------------------------|---------------------|---------------------------------|-------------------------------------|---------------------------------------|--------------------------------------|-------------------------------------|-------------------------------------|---------------------------------|---------------------------------|-------------------------------|
|                                         | LOH                 | Yes                             | c.2432C>G<br>p.S811X                | c.1660C>T<br>p.R554X                  | c.2432C>G<br>p.S811X                 | c.694C>T<br>p.R232X                 | c.994C>T,<br>p.R332X                | c.2432C>G<br>p.S811X            |                                 |                               |
|                                         | Residual<br>20AARs  | 3                               | No                                  | No                                    | No                                   | No                                  | No                                  | No                              |                                 |                               |
| Patient 7<br>c. 8136del2<br>p.2711-12fs | Truncating          | c.4660_61insA<br>p.T1556fs      | Rectum 1<br>c.4392del2<br>p.S1465fs | Rectum 2<br>c.4660_61inA<br>p.T1556fs | Rectum 3<br>c. 4457del2<br>p.D1486fs | Rectum 4<br>c.4392del2<br>p.S1465fs | Rectum 5<br>c.4392del2<br>p.S1465fs | TC 1<br>c.4489delC<br>p.P1497fs | TC 2<br>c.4489delC<br>p.P1497fs | TC 3<br>c.4216C>T<br>p.Q1406X |
|                                         | LOH                 | No                              | No                                  | No                                    | No                                   | No                                  | No                                  | No                              | No                              | No                            |
|                                         | Residual<br>20AARs  | 3                               | 2                                   | 3                                     | 2                                    | 2                                   | 2                                   | 3                               | 3                               | 2                             |
|                                         | Truncating          | Colonic lesions<br>continued... | TC 4                                | TC5                                   | AC 1                                 | AC 2                                | AC 3                                | AC 4                            |                                 |                               |
|                                         | LOH                 |                                 | c.4318delC<br>p.P1440fs             | c.3925_29del5<br>p.E1309fs            | c.4473delT<br>p.A1492fs              | c.4358delC<br>p.P1453fs             | c.4660_61insA<br>p.T1556fs          | c4127_28del2<br>p.1376fs        |                                 |                               |
|                                         | Residual 20<br>AARs |                                 | No                                  | Yes                                   | No                                   | No                                  | No                                  | Yes                             |                                 |                               |
|                                         |                     |                                 | 2                                   | 1, 1                                  | 2                                    | 2                                   | 3                                   | 1,1                             |                                 |                               |

**Supplementary Table 3. Upper and lower GI polyp mutation profiles in individual FAP patients.** Mutations are classified using standard nomenclature where c stands for complementary DNA sequence followed by the nucleotide number and the nucleotide change and p stands for protein sequence followed by the amino acid code letter change flanking the altered amino acid number. The number of retained 20 amino acid repeats (20AARs) is listed under each mutation. Significantly more 20AARs were retained in upper GI lesions than lower GI polyps (Binomial test, p=0.002) Fs - frame shift; DC - descending colon; TC – transverse colon; AC – ascending colon

**Supplementary table 4A**

| Patient age,<br>gender | Dukes<br>stage | Location  | <i>APC</i><br>mutation 1 | <i>APC</i><br>mutation 2 | Retained<br>20AARs |
|------------------------|----------------|-----------|--------------------------|--------------------------|--------------------|
| 82 F                   | NK             | Caecum    | c.3871C>T<br>p.Q1291X    | c.645C>T<br>p.R216X      | 1, 0               |
| 46 F                   | C              | Caecum    | c.3340C>T<br>p.R1114X    | c.4343delC<br>p.T1448fs  | 0, 2               |
| NK                     | NK             | Caecum    | c.847C>T<br>p.R283X      | c.4343delC<br>p.T1448fs  | 0, 2               |
| 77 F                   | C              | Caecum    | c.4333insAT<br>p.T1445fs | LOH                      | 2, 2               |
| 77 M                   | NK             | Ascending | c.4348C>T<br>p.R1450X    | LOH                      | 2, 2               |
| 72 M                   | C              | Left      | c.4012C>T<br>p.Q1338X    | LOH                      | 1, 1               |
| 81 M                   | B              | Sigmoid   | c.637C>T<br>p.R213X      | c.4231delG<br>p.C1410fs  | 0, 2               |
| 71 M                   | A              | Sigmoid   | c.3943insA<br>p.R1314fs  | c.637C>T<br>p.R213X      | 1, 0               |
| 73 M                   | B              | Sigmoid   | c.4659del5<br>p.E1554fs  | c.4147insA<br>p.M1383fs  | 0, 2               |
| 64 M                   | NK             | Sigmoid   | c.4334insCT<br>p.1445fs  | LOH                      | 2, 2               |
| 86 F                   | B              | Sigmoid   | c.847C>T<br>p.R283X      | c.3949G>T<br>p.E1317     | 0, 1               |
| 75 M                   | B              | Rectum    | c.3934G>T<br>p.G1312X    | LOH                      | 1, 1               |
| 65 F                   | A              | Rectum    | c.3927del5<br>p.E1309fs  | LOH                      | 1, 1               |
| 56 M                   | B              | Rectum    | c.3694insC<br>p.1232fs   | LOH                      | 0, 0               |
| 57 M                   | B              | Rectum    | c.4132C>T<br>p.Q1378X    | LOH                      | 1, 1               |
| 83 F                   | C              | Rectum    | c.2460delT<br>p.T820fs   | LOH                      | 0, 0               |
| 58 M                   | B              | Rectum    | c.1860delT<br>p.L620fs   | c.4308delT<br>p.S1436fs  | 0, 2               |
| 75 M                   | NK             | Rectum    | c.3340C>T<br>p.R1114X    | LOH                      | 0, 0               |
| 64 F                   | NK             | Rectum    | c.4263delT<br>p.S1421fs  | LOH                      | 2, 2               |

**Supplementary table 4B**

| COSMIC sample ID | Location | Cumulative total retained 20AAR's | COSMIC sample ID | Location | Cumulative total retained 20AAR's |
|------------------|----------|-----------------------------------|------------------|----------|-----------------------------------|
| 736984           | Right    | 5                                 | 1430400          | Left     | 2                                 |
| 874934           | Right    | 2                                 | 736987           | Right    | 4                                 |
| 874961           | Right    | 1                                 | 908482           | Left     | 2                                 |
| 874963           | Right    | 1                                 | 909748           | Left     | 0                                 |
| 874964           | Right    | 1                                 | 990137           | Right    | 4                                 |
| 874965           | Right    | 2                                 | 995381           | Left     | 2                                 |
| 874967           | Right    | 2                                 | 995391           | Right    | 6                                 |
| 874975           | Right    | 1                                 | 995397           | Left     | 4                                 |
| 875010           | Right    | 4                                 | 995400           | Left     | 0                                 |
| 907794           | Right    | 3                                 | 995404           | Left     | 2                                 |
| 908457           | Right    | 2                                 | 995408           | Left     | 4                                 |
| 909755           | Left     | 2                                 | 995409           | Right    | 2                                 |
| 910783           | Left     | 1                                 | 995413           | Left     | 4                                 |
| 995375           | Left     | 2                                 | 1206145          | Left     | 4                                 |
| 995385           | Right    | 5                                 | 1206183          | Left     | 2                                 |
| 995387           | Left     | 2                                 | 1235040          | Right    | 4                                 |
| 995401           | Right    | 3                                 | 1235041          | Right    | 4                                 |
| 995412           | Left     | 3                                 | 1235045          | Right    | 2                                 |
| 995651           | Left     | 3                                 | 1235046          | Left     | 0                                 |
| 1231126          | Left     | 3                                 | 1235051          | Right    | 4                                 |
| 1235039          | Left     | 2                                 | 1235054          | Right    | 4                                 |
| 1235043          | Right    | 2                                 | 1235056          | Right    | 2                                 |
| 1235055          | Left     | 1                                 | 1235058          | Left     | 0                                 |
| 1235057          | Left     | 2                                 | 1235066          | Left     | 2                                 |
| 1235059          | Right    | 2                                 | 1235067          | Left     | 0                                 |
| 1235061          | Right    | 0                                 | 1235068          | Left     | 0                                 |
| 1322285          | Left     | 1                                 | 1235069          | Left     | 2                                 |
| 1322293          | Right    | 3                                 | 1235073          | Right    | 4                                 |
| 1322287          | Right    | 2                                 |                  |          |                                   |

**Supplementary table 4A and B: Sporadic colorectal cancers and cell lines**

**Table 4A. Genotyped sporadic colorectal cancers.** 19 sporadic colorectal cancer cases from specified colonic locations were genotyped and two hits at *APC* were identified. **Table 4B. Publically available data from COSMIC v53.**

57 tumors and cell-lines with positional data and two hits at *APC* were identified. The number of retained 20 amino acid repeats (20AARs) resultant from the identified mutations is stated. Mutations are classified using standard nomenclature where “c.” stands for cDNA sequence followed by the nucleotide number and the nucleotide change and “p.” stands for protein sequence followed by the amino acid code letter change flanking the altered amino acid number.

Abbreviations M, male; F, female; LOH, loss of heterozygosity (determined by 5q microsatellite analysis); NK, not known.

### **Supplementary figure legends**

#### **Supplementary figure 1**

##### **Examples of immunohistochemical staining for cell lineage and apoptosis in wild-type and *Ctnnb1<sup>Δex3</sup>* mice.**

In wild type mice lysozyme staining for Paneth cells is restricted to cells at the base of crypts. No such positional restriction is seen in the section of a *Ctnnb1<sup>Δex3</sup>* mouse where brown stained Paneth cells can be seen the length of the grossly enlarged crypts. Occasional chromogranin A stained cells can be seen in both normal and mutant intestinal crypts but no significant difference in number could be found. Apoptotic cells stained positive for cleaved caspase 3 (black arrows) were uncommon in the normal intestinal crypts but were significantly more prevalent in the dysplastic crypts of *Ctnnb1<sup>Δex3</sup>* mice.

#### **Supplementary figure 2**

**A. Physiological mesenchymal *Sfrp2* expression in human and mouse intestinal tracts.** Mesenchymal expression of this important Wnt modulator varies considerably along the length of the human and murine intestines, with a reverse gradient seen in the two different species. Mouse colonic mesenchymal *SFRP2* expression is greater than 130-fold that seen in the small intestinal mesenchyme.

**B. Recombinant *Sfrp2* antagonises endogenous Wnt activity in rodent intestinal epithelial cells.** Culturing RIE cells with recombinant SFRP2 at physiological (15nM) and supra-physiological (150 and 300nM) concentrations resulted in a dose dependent decrease in Wnt target gene activity as a consequence of endogenous physiological Wnt pathway antagonism.

### **Supplementary References**

1. Poulosom R, Longcroft JM, Jeffery RE et al. A robust method for isotopic riboprobe in situ hybridisation to localise mRNAs in routine pathology specimens. *Eur J Histochem*. 1998;**42(2)**:121-32.
2. Thirlwell C, Will O, Domingo E et al. Clonality assessment and clonal ordering of individual neoplastic crypts shows polyclonality of colorectal adenomas. *Gastroenterology*. 2010 Apr;**138(4)**:1441-54, 54.e1-7.
3. Galli LM, Barnes T, Cheng T et al. Differential inhibition of Wnt-3a by Sfrp-1, Sfrp-2, and Sfrp-3. *Dev Dyn*. 2006 Mar;**235(3)**:681-90.
4. Kress E, Rezza A, Nadjar J et al. The frizzled-related sFRP2 gene is a target of thyroid hormone receptor alpha1 and activates beta-catenin signaling in mouse intestine. *J Biol Chem*. 2009 Jan 9;**284(2)**:1234-41.
5. von Marschall Z, Fisher LW. Secreted Frizzled-related protein-2 (sFRP2) augments canonical Wnt3a-induced signaling. *Biochem Biophys Res Commun*. 2010 Sep 24;**400(3)**:299-304.
