# Supplementary figures and images for: A basal gradient of Wnt and stem-cell number influences regional tumour distribution in human and mouse intestinal tracts
Source: PubMed Central journal article supplement — Gut. 2012 Jan 27;62(1):83–93. doi: 10.1136/gutjnl-2011-301601 (PMC3551213; doi:10.1136/gutjnl-2011-301601), 2012-01-27

A.

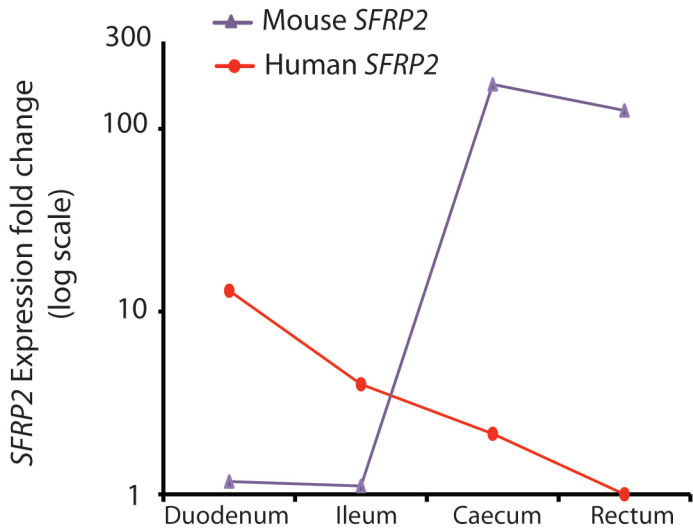

B.

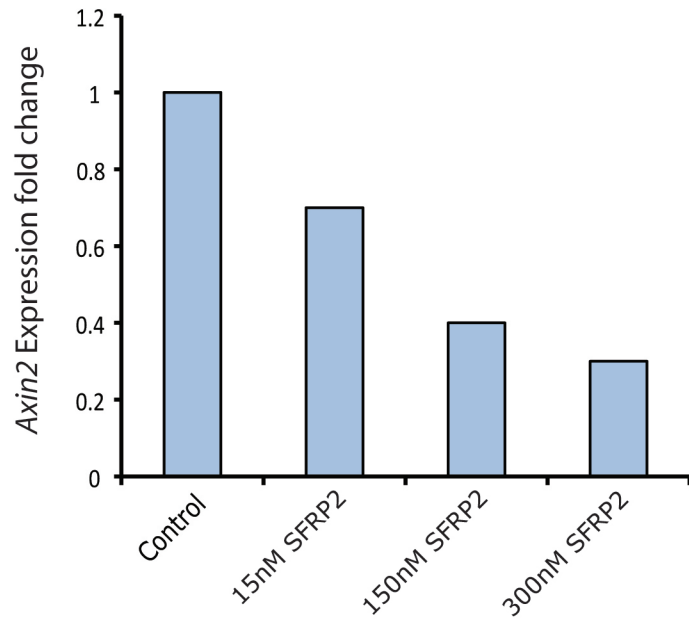

Supplement: gutjnl-2011-301601-s2.pdf [file gutjnl-2011-301601-s2.pdf]

Wild-type

*Ctnnb1* <sup>$\Delta$ ex3</sup> mice

Lysozyme stain

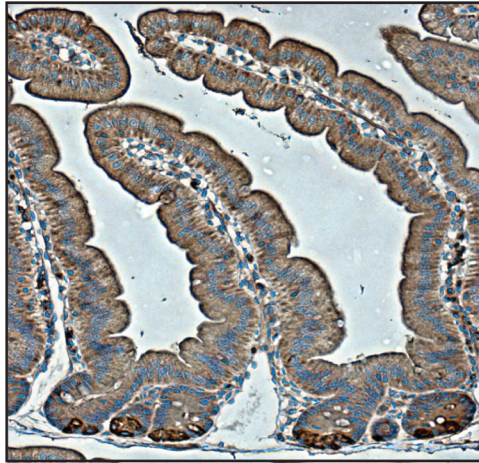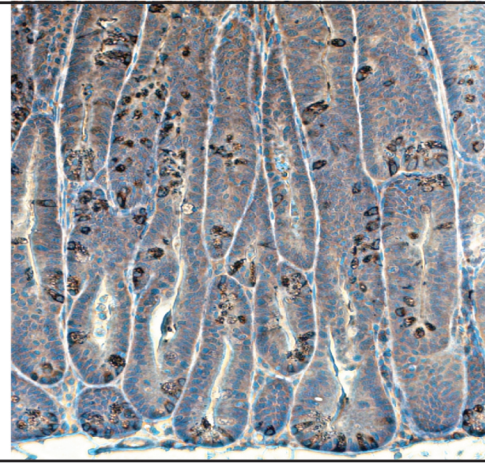

Chromogranin stain

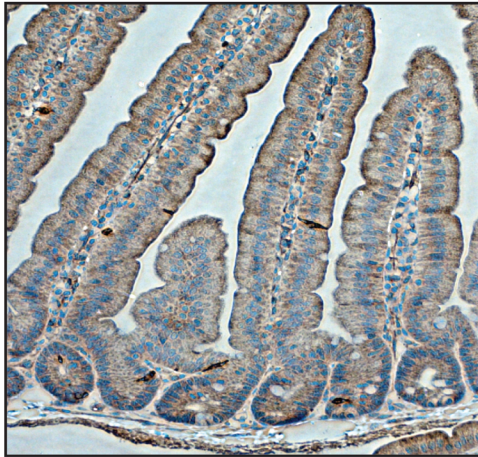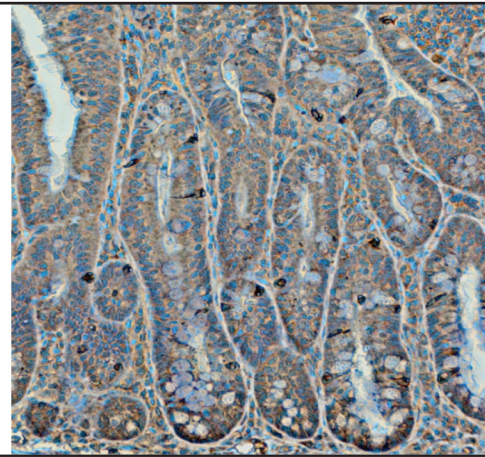

Cleaved caspase 3 stain

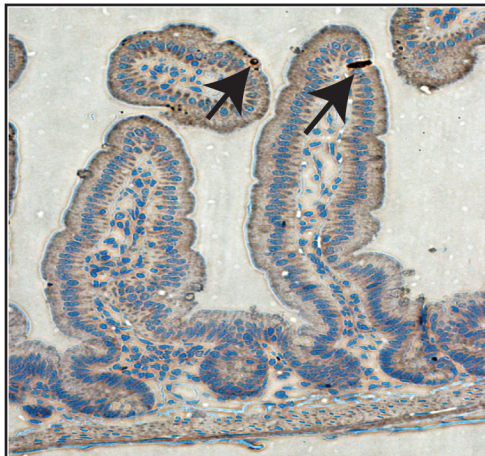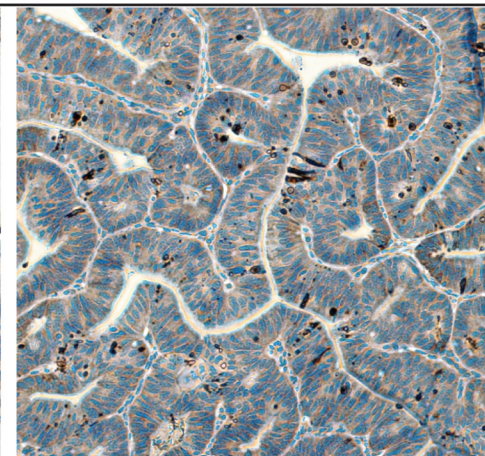

Supplement: gutjnl-2011-301601-s3.pdf [file gutjnl-2011-301601-s3.pdf]
